# Supplementary material
Source: publisher figshare collection journal article supplement (https://karger.figshare.com/ndownloader/files/28842678)
Supplement: Supplementary file 1 [file 28842678]

**Supplementary Table**

| Supplementary Table. Cox proportional hazard models of overall survival | | | | | |
| --- | --- | --- | --- | --- | --- |
|  |  | Univariate | Multivariate | | |
|  |  | p values | p value | HR | 95% CI |
| Age (<70 vs. ≧70 years) | | <0.001 | *<0.001* | 2.02 | 1.88-2.17 |
| Sex (female vs. male) | | <0.001 | *<0.001* | 1.37 | 1.27-1.47 |
| Primary tumor location (Colon vs. Rectum) | | <0.001 | *<0.001* | 1.21 | 1.13-1.30 |
| SCRCs (absent vs. present) | | 0.03 | 0.59 | 1.04 | 0.90-1.18 |
| SEMs (absent vs. present) | |  |  |  |  |
|  | Stomach | <0.001 | *<0.001* | 1.63 | 1.33-2.01 |
|  | Lung | <0.001 | *<0.001* | 2.32 | 1.75-3.08 |
|  | Breast | 0.12 | 0.30 | 1.51 | 0.81-2.82 |
|  | Prostate | 0.12 | 0.60 | 1.17 | 0.73-1.89 |
|  | Others | <0.001 | *<0.001* | 2.65 | 2.25-3.12 |
| Histological type (well/mod vs. others) | | <0.001 | *<0.001* | 1.57 | 1.40-1.76 |
| T factor (T1-T2 vs. T3-T4) | | <0.001 | *<0.001* | 1.89 | 1.73-2.07 |
| pN factor (absent vs. present) | | <0.001 | *<0.001* | 2.02 | 1.86-2.20 |
| Lymphatic invasion (absent vs. present) | | <0.001 | *<0.001* | 1.32 | 1.22-1.43 |
| Venous invasion (absent vs. present) | | <0.001 | *<0.001* | 1.27 | 1.17-1.38 |
| Adjuvant chemotherapy (absent vs. present) | | <0.001 | *<0.001* | 0.61 | 0.56-0.66 |
|  |  |  |  |  |  |
| SEMs : Synchronous extra-colorectal malignancies | | | | | |
| SCRCs : Synchronous colorectal cancers | | | | | |
